# Supplementary material for: Electrospun PLA-Based Biomaterials Loaded with Melissa officinalis Extract with Strong Antioxidant Activity
Source: MDPI journal article supplement (doi:10.3390/polym15051070), 2023-02-21
Supplement: s1 [file s1]

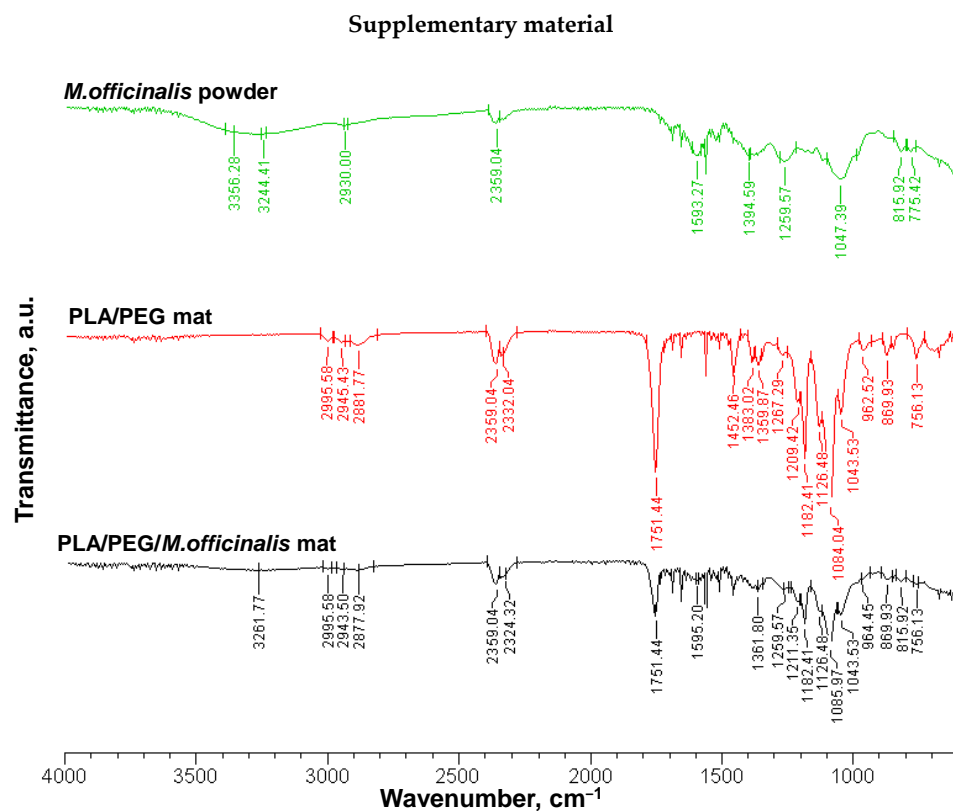

**Figure S1.** ATR-FTIR spectra of *M. officinalis* (powder), PLA/PEG fibrous mat and PLA/PEG/*M. officinalis* fibrous mat.
